# Supplementary material for: Prevalence of Intestinal Parasitic Infections among Children in Europe over the Last Five Years
Source: MDPI journal article supplement (doi:10.3390/tropicalmed6030160), 2021-09-02
Supplement: s1 [file s1]

# Supplementary material of Prevalence of Intestinal Parasitic Infections among Children in Europe over the Last Five Years

**Table S1.** Preferred Reporting Items for Systematic Reviews and Meta-Analyses (PRISMA) checklist.

|                               |    |                                                                                                                                                                                                          |    |
|-------------------------------|----|----------------------------------------------------------------------------------------------------------------------------------------------------------------------------------------------------------|----|
| Risk of bias across studies   | 15 | Specify any assessment of risk of bias that may affect the cumulative evidence (e.g., publication bias, selective reporting within studies).                                                             | 5  |
| Additional analyses           | 16 | Describe methods of additional analyses (e.g., sensitivity or subgroup analyses, meta-regression), if done, indicating which were pre-specified.                                                         | NA |
| <b>RESULTS</b>                |    |                                                                                                                                                                                                          |    |
| Study selection               | 17 | Give numbers of studies screened, assessed for eligibility, and included in the review, with reasons for exclusions at each stage, ideally with a flow diagram.                                          | 6  |
| Study characteristics         | 18 | For each study, present characteristics for which data were extracted (e.g., study size, PICOS, follow-up period) and provide the citations.                                                             | 6  |
| Risk of bias within studies   | 19 | Present data on risk of bias of each study and, if available, any outcome level assessment (see item 12).                                                                                                | 6  |
| Results of individual studies | 20 | For all outcomes considered (benefits or harms), present, for each study: (a) simple summary data for each intervention group (b) effect estimates and confidence intervals, ideally with a forest plot. | 6  |

|                      |    |                                                                                                         |    |
|----------------------|----|---------------------------------------------------------------------------------------------------------|----|
| Synthesis of results | 21 | Present results of each meta-analysis done, including confidence intervals and measures of consistency. | NA |
|----------------------|----|---------------------------------------------------------------------------------------------------------|----|

**Table S1.** Preferred Reporting Items for Systematic Reviews and Meta-Analyses (PRISMA) checklist

| Section/topic      | # | Checklist item                                                                                                                                                                                                                                                                                              | Reported on page # |
|--------------------|---|-------------------------------------------------------------------------------------------------------------------------------------------------------------------------------------------------------------------------------------------------------------------------------------------------------------|--------------------|
| TITLE              |   |                                                                                                                                                                                                                                                                                                             |                    |
| Title              | 1 | Identify the report as a systematic review, meta-analysis, or both.                                                                                                                                                                                                                                         | 1                  |
| ABSTRACT           |   |                                                                                                                                                                                                                                                                                                             |                    |
| Structured summary | 2 | Provide a structured summary including, as applicable: background; objectives; data sources; study eligibility criteria, participants, and interventions; study appraisal and synthesis methods; results; limitations; conclusions and implications of key findings; systematic review registration number. | 2                  |
| INTRODUCTION       |   |                                                                                                                                                                                                                                                                                                             |                    |
| Rationale          | 3 | Describe the rationale for the review in the context of what is already known.                                                                                                                                                                                                                              | 3                  |
| Objectives         | 4 | Provide an explicit statement of questions being addressed with reference to participants, interventions, comparisons, outcomes, and study design (PICOS).                                                                                                                                                  | 4                  |
| METHODS            |   |                                                                                                                                                                                                                                                                                                             |                    |

|                            |    |                                                                                                                                                                                                        |     |
|----------------------------|----|--------------------------------------------------------------------------------------------------------------------------------------------------------------------------------------------------------|-----|
| Protocol and registration  | 5  | Indicate if a review protocol exists, if and where it can be accessed (e.g., Web address), and, if available, provide registration information including registration number.                          | N/A |
| Eligibility criteria       | 6  | Specify study characteristics (e.g., PICOS, length of follow-up) and report characteristics (e.g., years considered, language, publication status) used as criteria for eligibility, giving rationale. | 4-5 |
| Information sources        | 7  | Describe all information sources (e.g., databases with dates of coverage, contact with study authors to identify additional studies) in the search and date last searched.                             | 4-5 |
| Search                     | 8  | Present full electronic search strategy for at least one database, including any limits used, such that it could be repeated.                                                                          | 4   |
| Study selection            | 9  | State the process for selecting studies (i.e., screening, eligibility, included in systematic review, and, if applicable, included in the meta-analysis).                                              | 4-5 |
| Data collection process    | 10 | Describe method of data extraction from reports (e.g., piloted forms, independently, in duplicate) and any processes for obtaining and confirming data from investigators.                             | 5   |
| Data items                 | 11 | List and define all variables for which data were sought (e.g., PICOS, funding sources) and any assumptions and simplifications made.                                                                  | 5   |
| Risk of bias in individual | 12 | Describe methods used for assessing risk of bias of individual studies (including specification of whether this was                                                                                    | 5   |

|                             |    |                                                                                                                                                                                      |     |
|-----------------------------|----|--------------------------------------------------------------------------------------------------------------------------------------------------------------------------------------|-----|
| studies                     |    | done at the study or outcome level), and how this information is to be used in any data synthesis.                                                                                   |     |
| Summary measures            | 13 | State the principal summary measures (e.g., risk ratio, difference in means).                                                                                                        | 5   |
| Synthesis of results        | 14 | Describe the methods of handling data and combining results of studies, if done, including measures of consistency (e.g., $I^2$ ) for each meta-analysis.                            | 5   |
| Risk of bias across studies | 22 | Present results of any assessment of risk of bias across studies (see Item 15).                                                                                                      | NA  |
| Additional analysis         | 23 | Give results of additional analyses, if done (e.g., sensitivity or subgroup analyses, meta-regression [see Item 16]).                                                                | NA  |
| <b>DISCUSSION</b>           |    |                                                                                                                                                                                      |     |
| Summary of evidence         | 24 | Summarize the main findings including the strength of evidence for each main outcome; consider their relevance to key groups (e.g., healthcare providers, users, and policy makers). | 7   |
| Limitations                 | 25 | Discuss limitations at study and outcome level (e.g., risk of bias), and at review-level (e.g., incomplete retrieval of identified research, reporting bias).                        | 9   |
| Conclusions                 | 26 | Provide a general interpretation of the results in the context of other evidence, and implications for future research.                                                              | 7-8 |
| <b>FUNDING</b>              |    |                                                                                                                                                                                      |     |
| Funding                     | 27 | Describe sources of funding for the systematic review and other support (e.g., supply of data); role of funders for the systematic review.                                           | 10  |
